# Supplementary material for: A self-delivery system based on an amphiphilic proapoptotic peptide for tumor targeting therapy
Source: Royal Society of Chemistry journal article supplement (doi:10.1039/c8tb02945h), 2018-12-21
Supplement: c8tb02945h1.pdf [file c8tb02945h1.pdf]

**Electronic Supplementary Information**  
*of*  
**Self-delivery system based on amphiphilic proapoptotic peptide for  
tumor targeting therapy**

*Si Chen,<sup>\*a</sup> Jin-Xuan Fan,<sup>b</sup> Xin-Hua Liu,<sup>b</sup> Ming-Kang Zhang,<sup>b</sup> Fan Liu,<sup>a</sup> Xuan Zeng,<sup>\*b</sup> Guo-Ping  
Yan<sup>\*a</sup> and Xian-Zheng Zhang<sup>b</sup>*

a. School of Material Science and Engineering, Wuhan Institute of Technology, Wuhan 430205, PR  
China.

b. Key Laboratory of Biomedical Polymers of Ministry of Education & Department of Chemistry,  
Wuhan University, Wuhan 430072, PR China.

\* Corresponding Authors. [sichen1989@163.com](mailto:sichen1989@163.com), [zeng\\_xuan@163.com](mailto:zeng_xuan@163.com), [guopyan2006@163.com](mailto:guopyan2006@163.com)

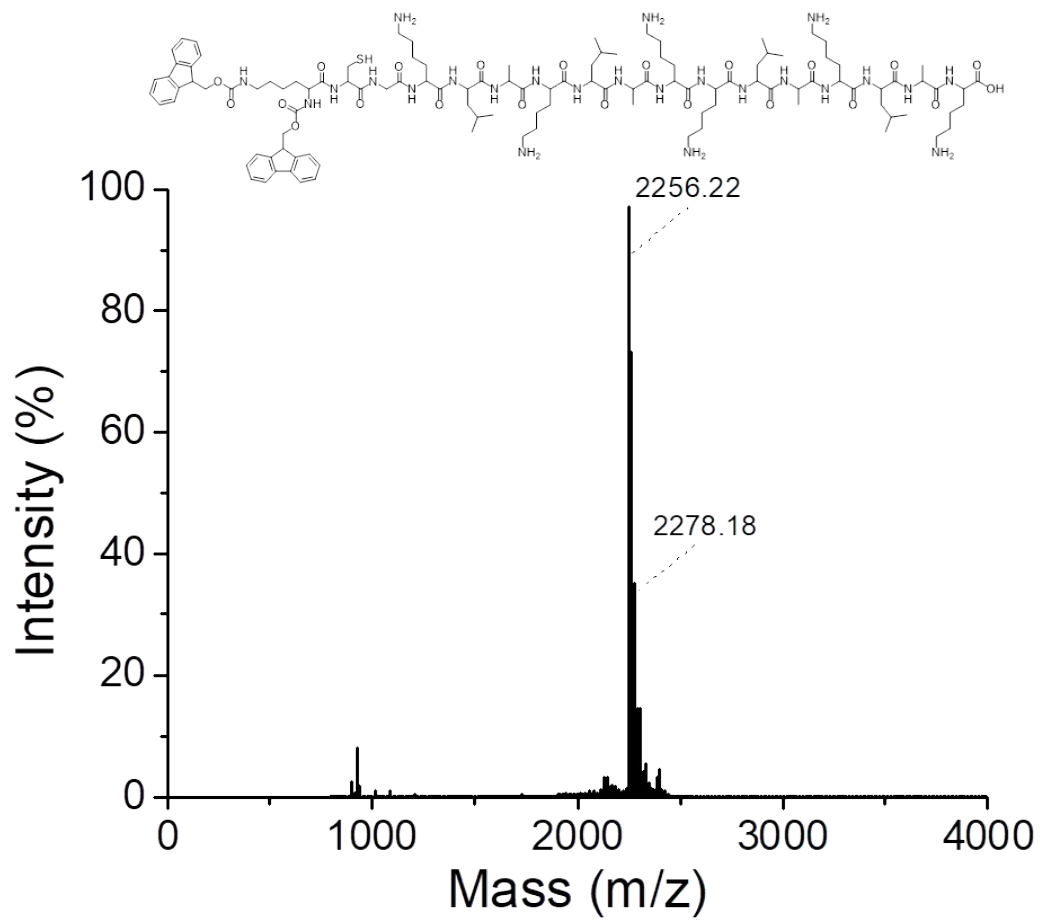

**Figure S1.** Chemical structure and mass spectra of KLAKLAKKLAKLAKGCK(Fmoc)<sub>2</sub>.

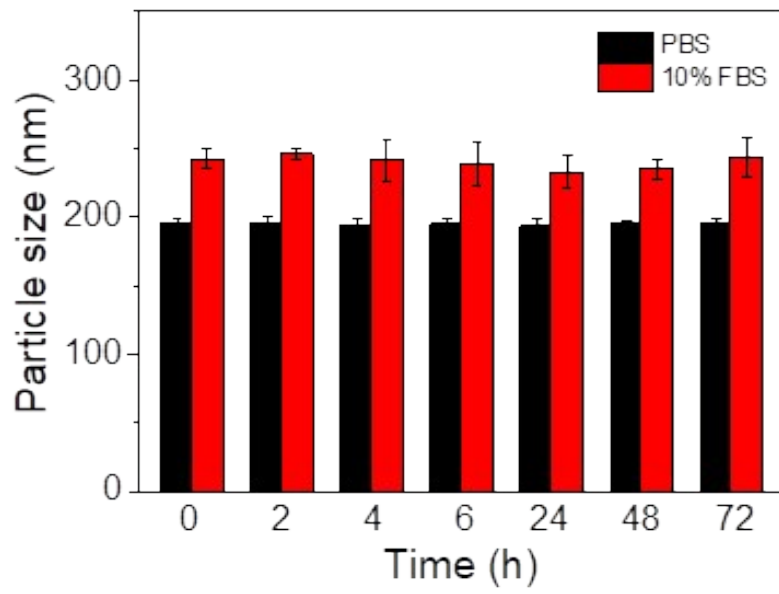

**Figure S2.** The particle size of KDH against medium with 10% serum or PBS

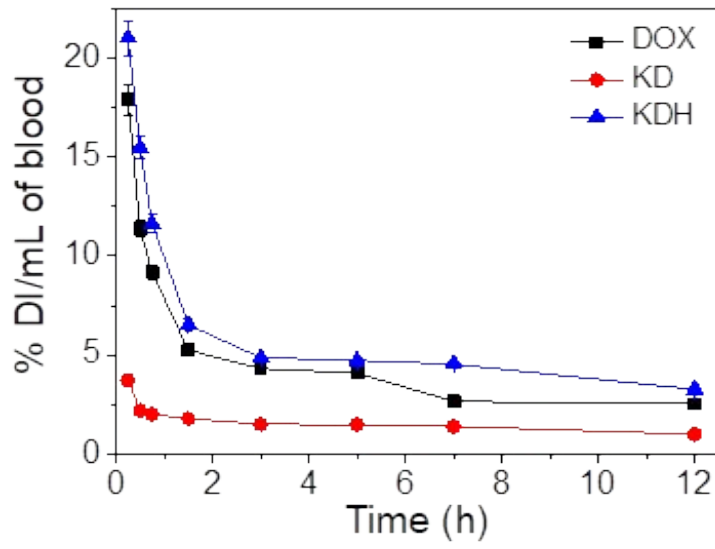

**Figure S3.** The pharmacodynamics study of samples

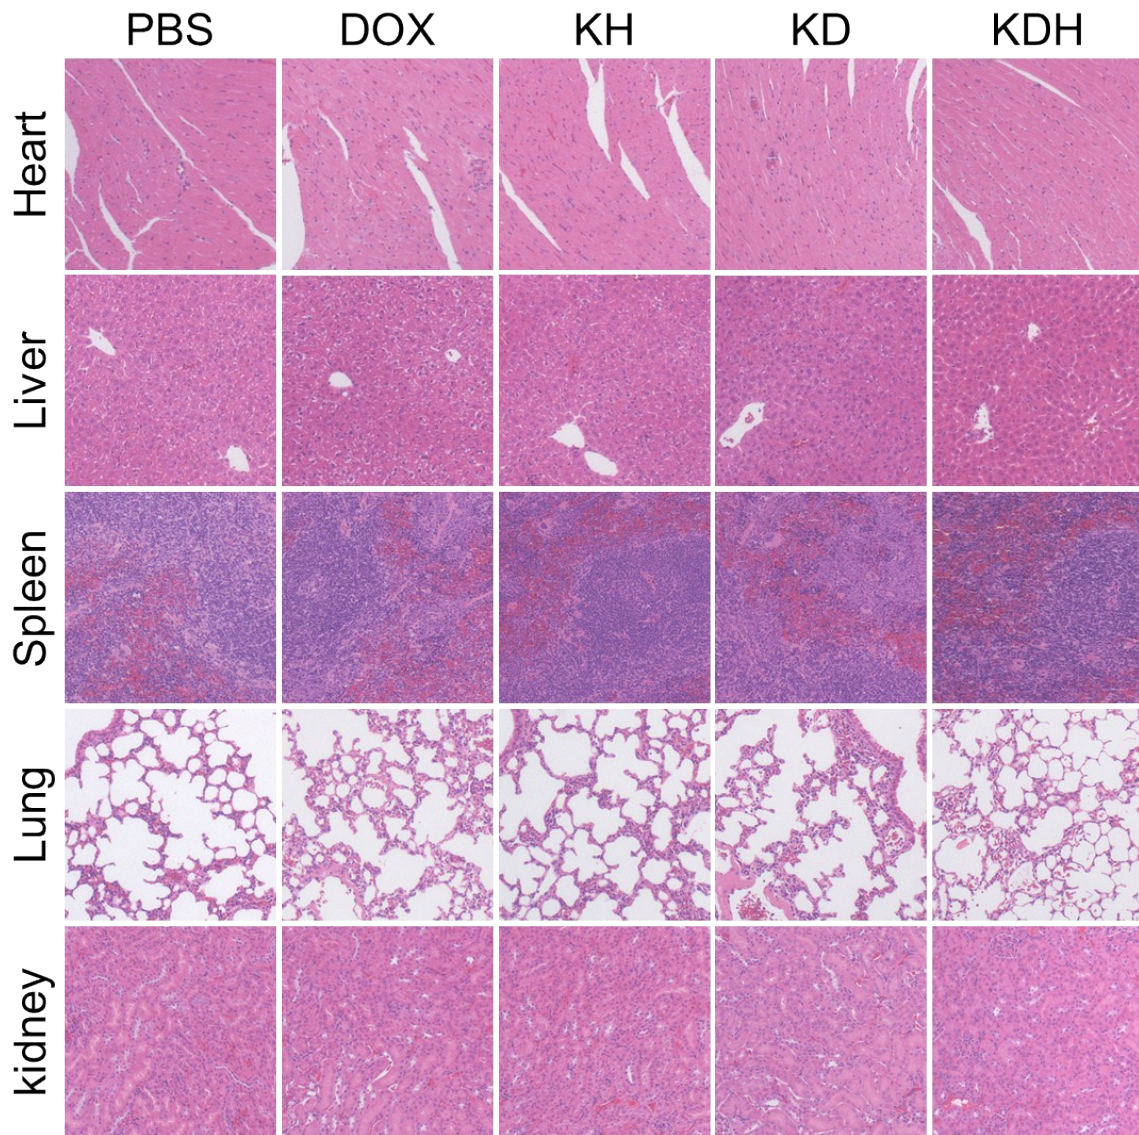

**Figure S4.** H&E staining images of organs after treated with samples at 15th day. The magnification was 40 ×.
